# Supplementary material for: Photonic flash-annealing of lead halide perovskite solar cells in 1 ms
Source: Royal Society of Chemistry journal article supplement (doi:10.1039/c5ta09431c), 2016-01-01
Supplement: c5ta09431c1.pdf [file c5ta09431c1.pdf]

## Supporting Information For: Photonic flash-annealing of lead halide perovskite solar cells in 1 ms

Joel Troughton<sup>1</sup>, Matthew J. Carnie<sup>1</sup>, Matthew L. Davies<sup>1</sup>, Cécile Charbonneau<sup>1</sup>,  
Eifion H. Jewell<sup>1</sup>, David A. Worsley<sup>1</sup>, and Trystan M. Watson<sup>1\*</sup>

<sup>1</sup>SPECIFIC – Swansea University College of Engineering, Bay Campus, SA1 8EN,  
United Kingdom

### Corresponding Author

\*t.m.watson@swansea.ac.uk

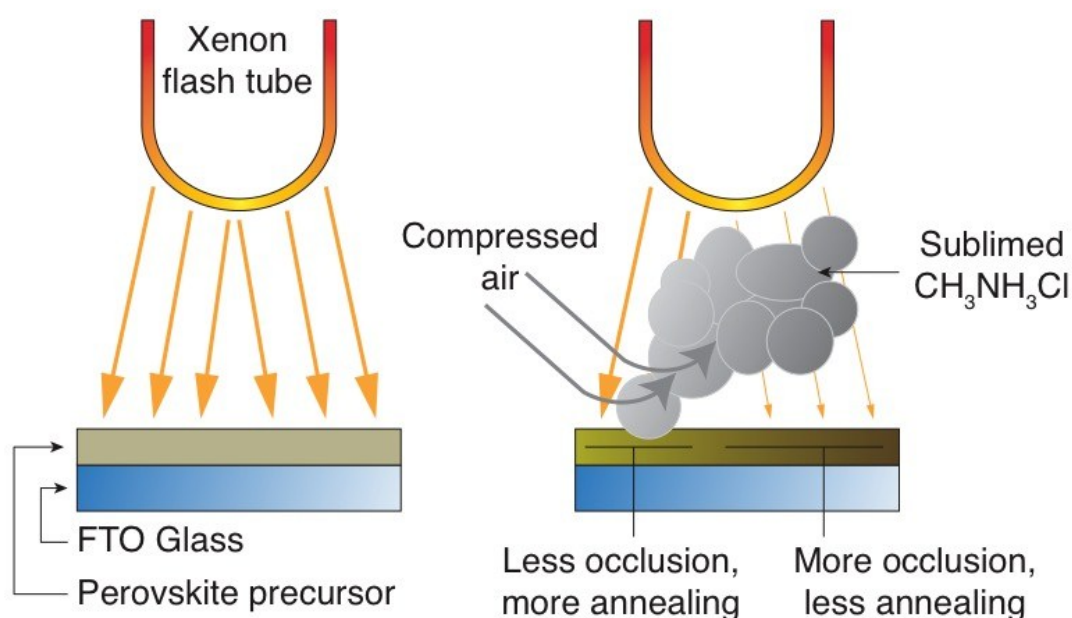

**Figure S1.** A schematic representation of the “forced-air front” responsible for the variations in film morphology across the glass’ surface. Rapidly sublimed  $\text{CH}_3\text{NH}_3\text{Cl}$  from the perovskite precursor during crystallization is blown across the substrate through the photonic tool’s compressed air stream, this vapor attenuates light and leads to less annealing in underlying regions.

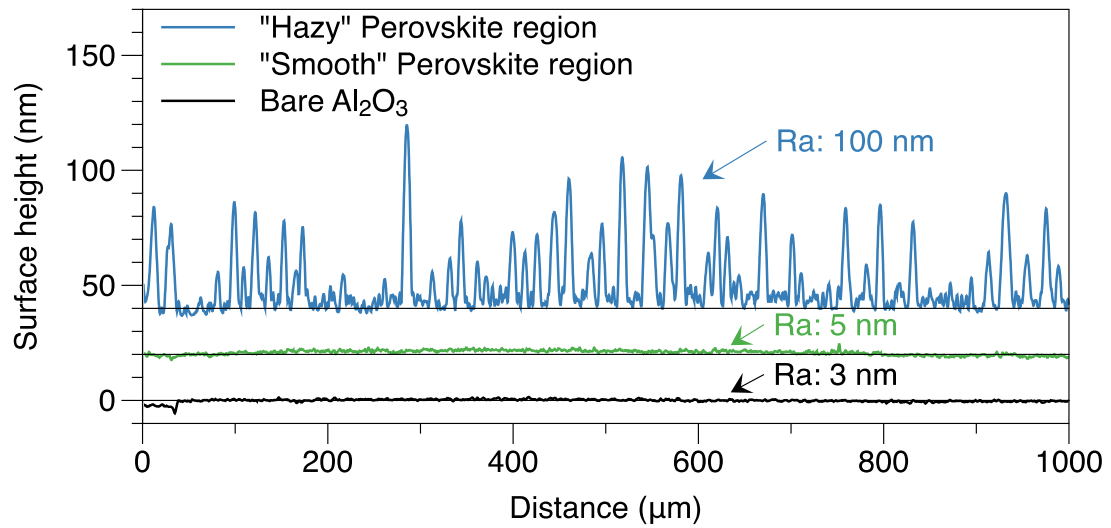

**Figure S2.** Profilometer measurements for “hazy” and “smooth” photonically crystallized perovskite regions with corresponding Ra values. Also shown is a scan for the bare Al<sub>2</sub>O<sub>3</sub> scaffold with no perovskite deposited
